# Supplementary material for: Wafer-scale patterning of high-resolution quantum dot films with a thickness over 10 μm for improved color conversion
Source: Royal Society of Chemistry journal article supplement (doi:10.1039/d3nr04615j), 2023-01-01
Supplement: d3nr04615j1.pdf [file d3nr04615j1.pdf]

## Supplementary Information

### Wafer-scale Patterning of High-resolution Quantum Dot Films with a Thickness over 10 $\mu\text{m}$ for Improved Color Conversion

Shenghan Zou, Yuzhi Li, and Zheng Gong\*

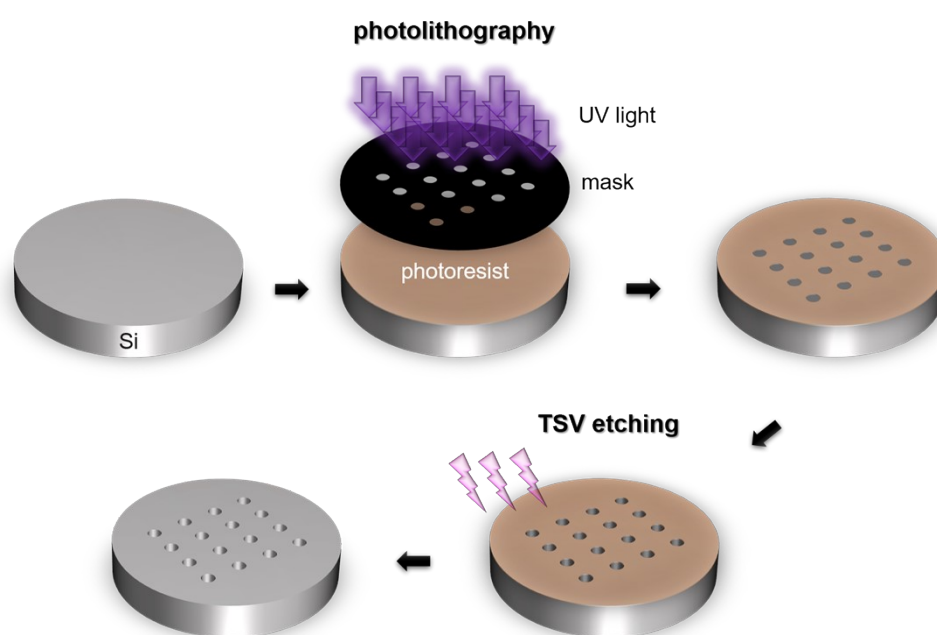

**Fig. S1** Schematic of fabrication process of patterned intaglio Si masters.

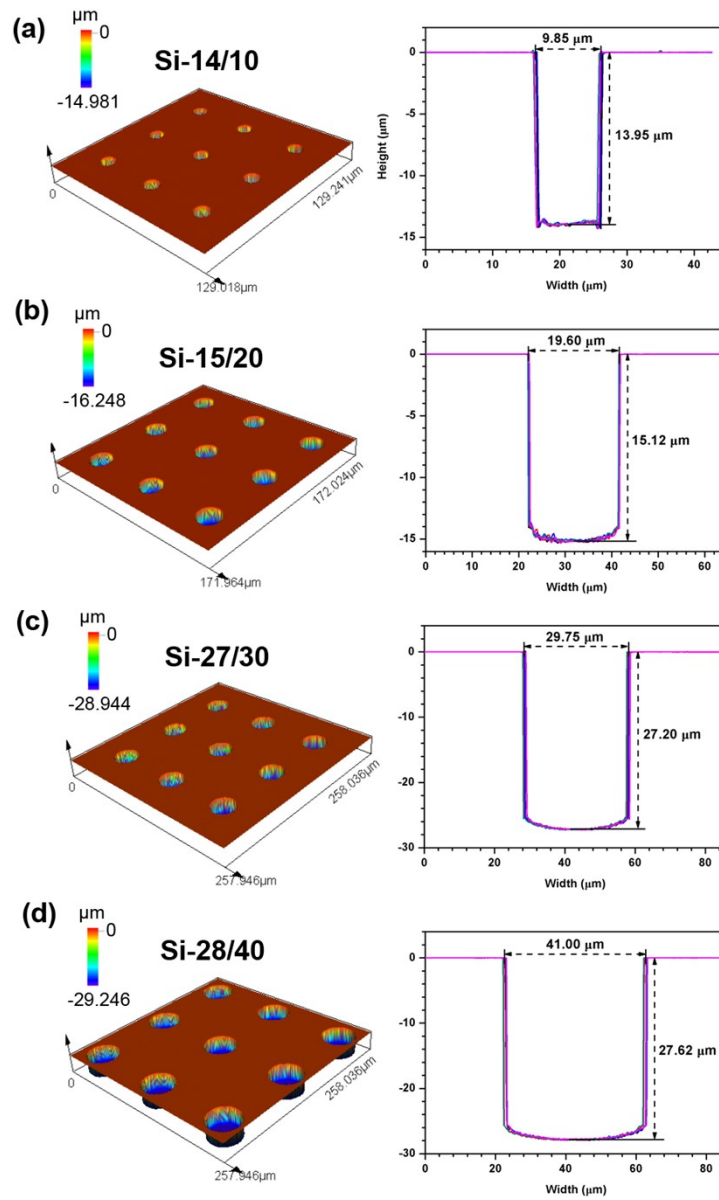

**Fig. S2** 3D LCM images and corresponding profile curves of fabricated (a) Si-14/10, (b) Si-15/20, (c) Si-27/30, and (d) Si-28/40 templates.

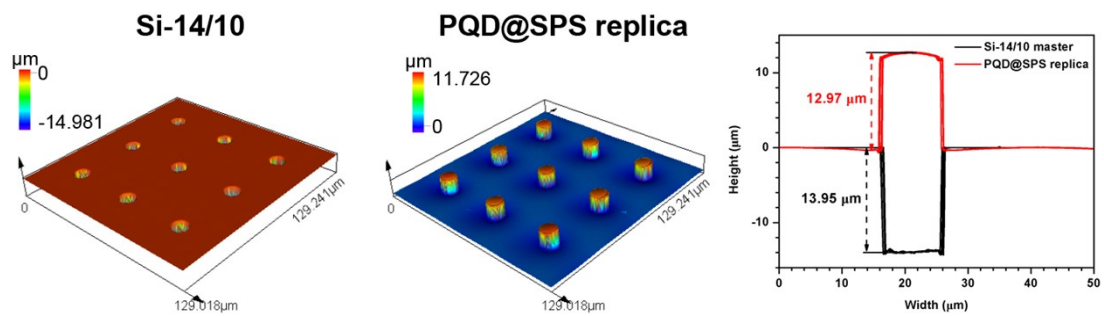

**Fig. S3** 3D LCM pictures of Si-14/10 template and resulted PQD@SPS replica (from left to right), and their corresponding profile curves collected in five random areas.

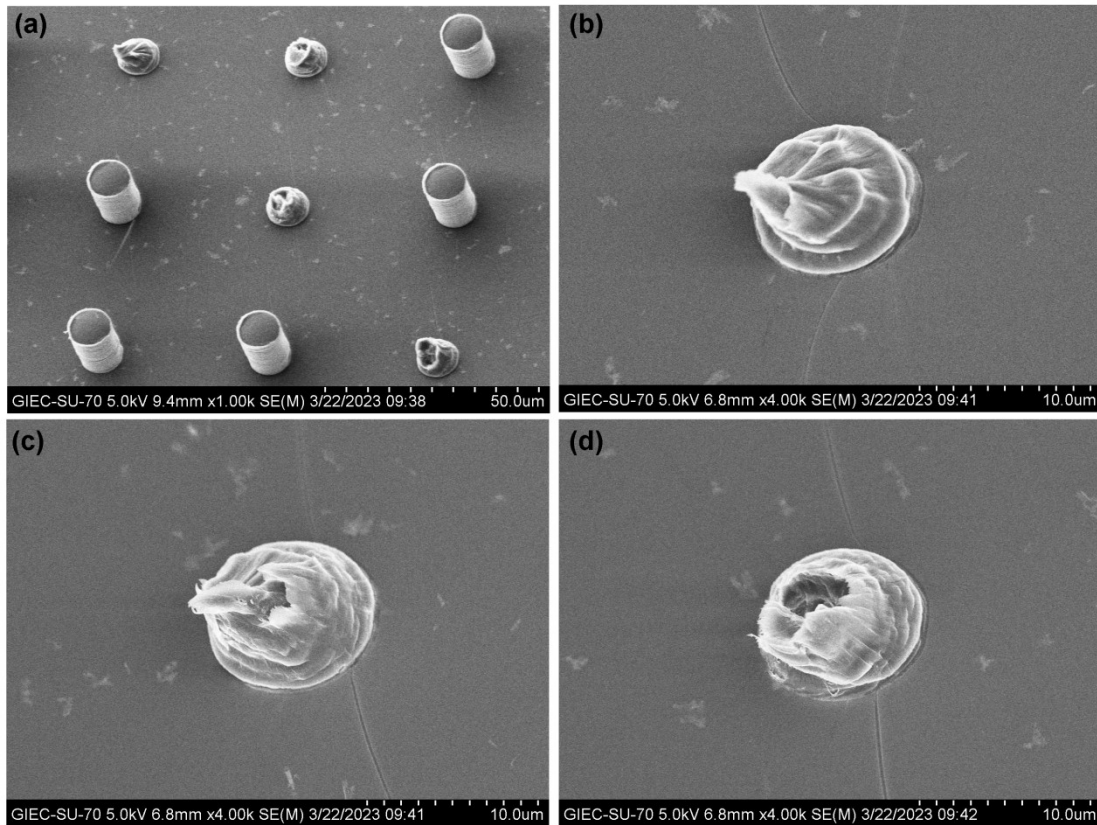

**Fig. S4** (a) Magnified SEM images of the resulted PQR@PS replica fabricated by Si-14/10 template, and further magnified (b-d) SEM images of different irregular fracture surfaces.

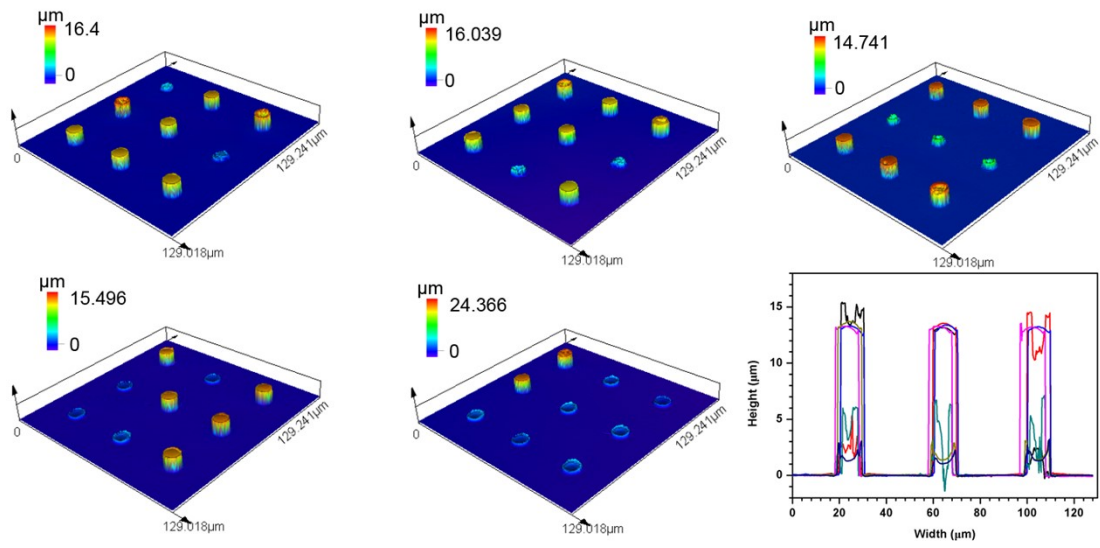

**Fig. S5** 3D LCM pictures of five random areas in resulted PQC@PS replica fabricated by Si-14/10 template, and their corresponding profile curves.

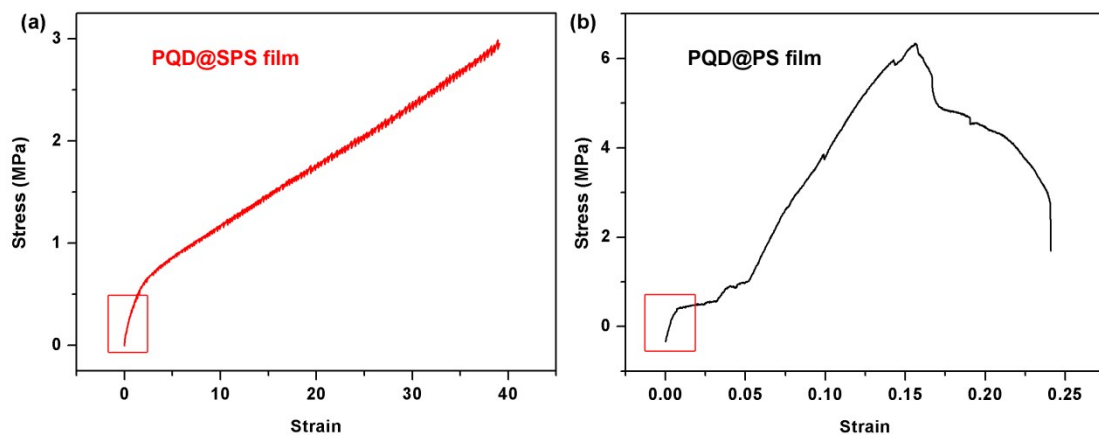

**Fig. S6** Stress-strain curves of (a) PQD@SPS film and (b) PQD@PS film, the elastic regions are marked by the red boxes.

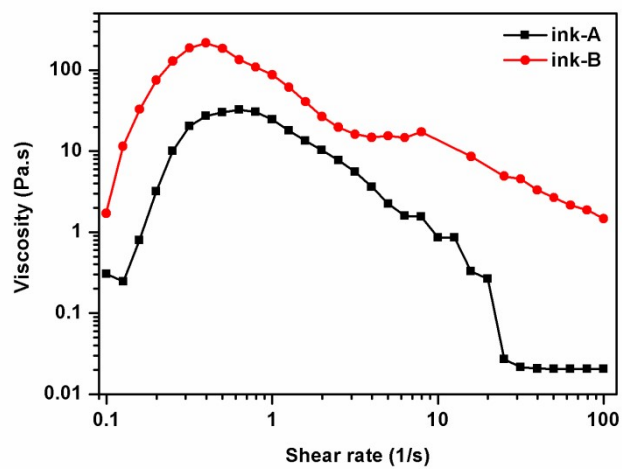

**Fig. S7** The viscosity-shear rate curves of synthesized PQD@SPS ink-A and ink-B.

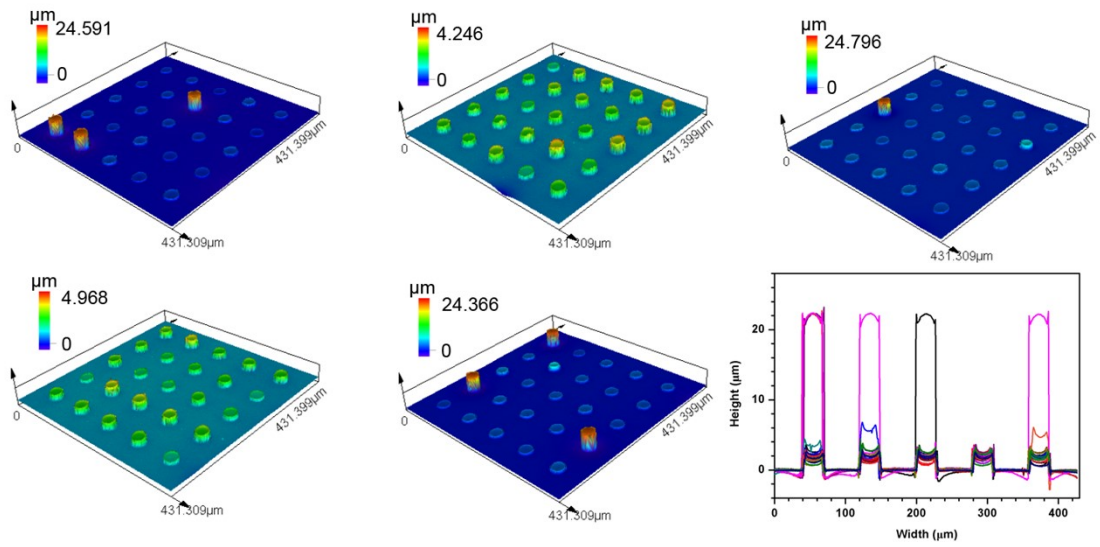

**Fig. S8** 3D LCM pictures of ink-B fabricated PQD@SPS pillar arrays in five random areas based on Si-27/30 template, and their corresponding profile curves.



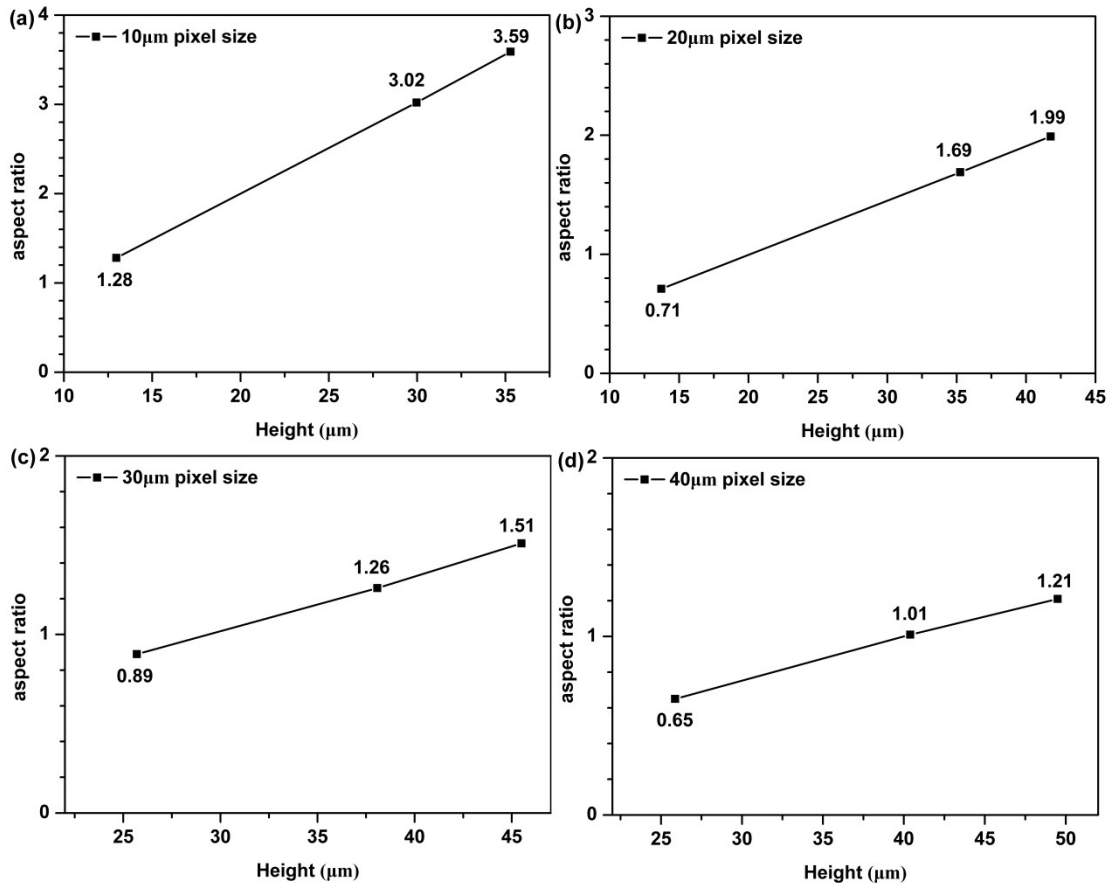

**Fig. S9** Aspect ratios of fabricated PQD@SPS replicas with an average pixel size of (a) 10  $\mu\text{m}$ , (b) 20  $\mu\text{m}$ , (c) 30  $\mu\text{m}$ , and (d) 40  $\mu\text{m}$ .

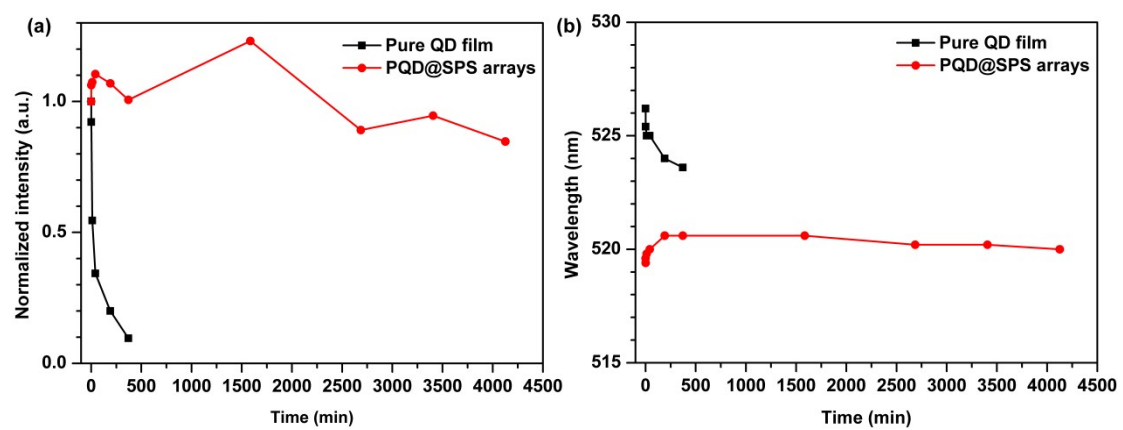

**Fig. S10** (a) Relative PL intensity and (b) emission wavelength of the samples against water treatment.

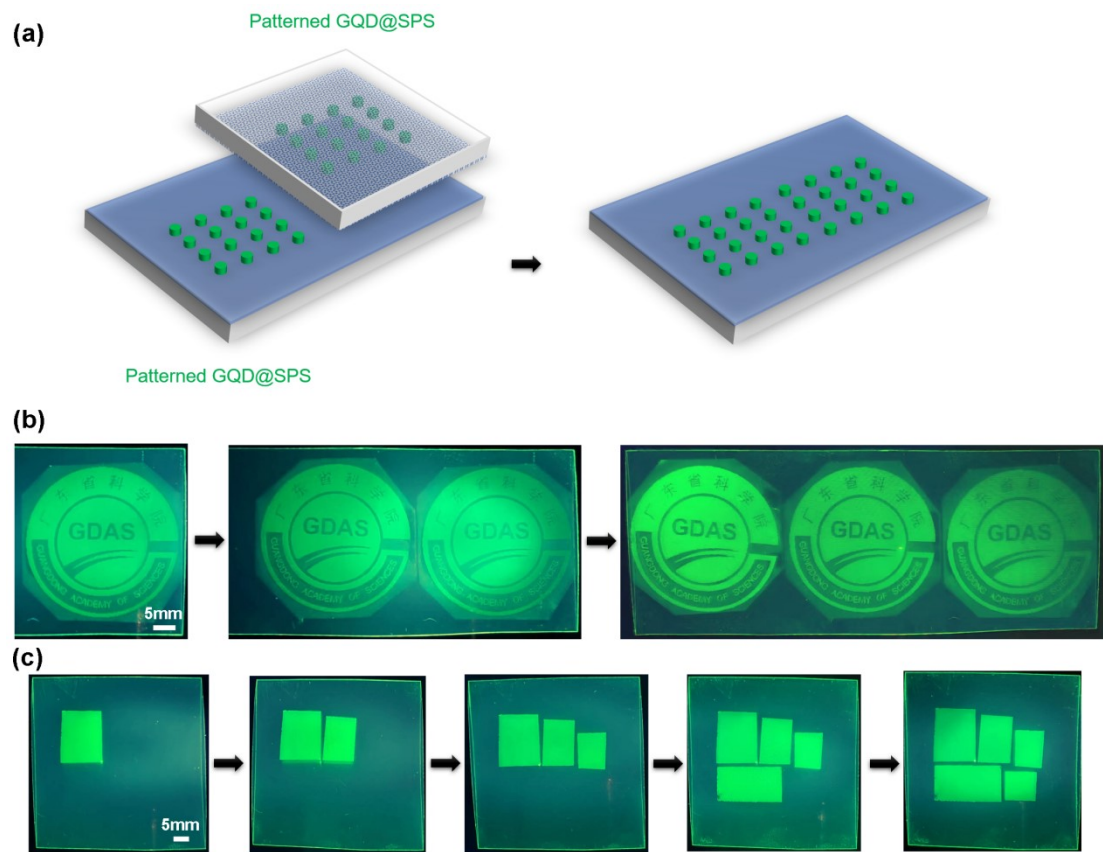

**Fig. S11** (a) Schematic illustration of sequentially integrating two etched green-emitting GQD@SPS pillars side by side to one clean substrate. (b) PL emission images of fabricated Guangdong Academy of Sciences macroscopic logo on a large substrate during the integration process. (c) PL emission images of fabricated patterns with different sizes and shapes on a same substrate during the integration process.

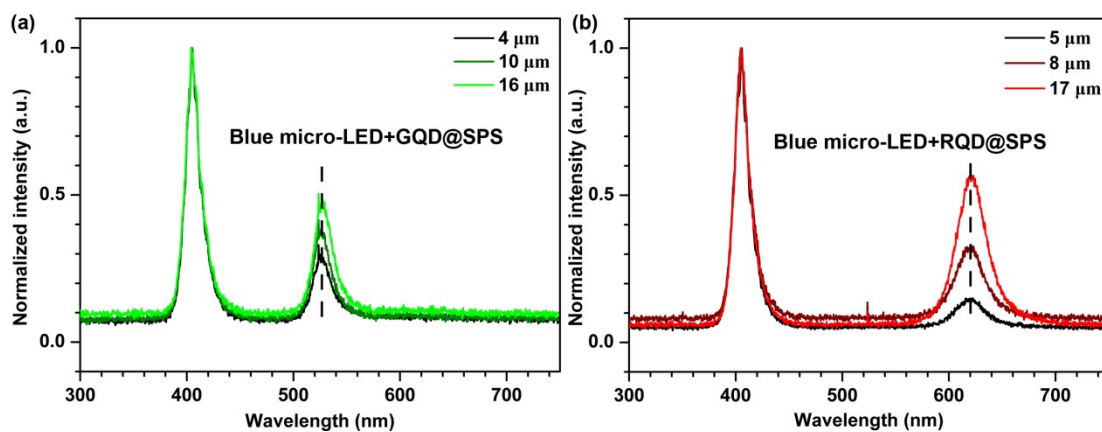

**Fig. S12** PL emission spectra of (a) GQD@SPS and (a) RQD@SPS films with different thicknesses on top of the blue micro-LED device.

**Table S1** Thickness comparison of recently reported QD patterns fabricated by various patterning methods.

| <b>references</b> | <b>Patterning method</b>                                               | <b>Thickness of QD patterns</b> |
|-------------------|------------------------------------------------------------------------|---------------------------------|
| This work         | RM-PE-TP technique                                                     | 19.74 $\mu\text{m}$             |
| 1                 | Direct in situ photolithography                                        | 10.4 $\mu\text{m}$              |
| 2                 | Photo-patterning method based on a light-driven ligand crosslinker     | 4.1 $\mu\text{m}$               |
| 3                 | Photolithography of QD/siloxane ink containing secondary thiol monomer | 10 $\mu\text{m}$                |
| 4                 | Direct patterning via thermally activated ligand chemistry             | 13.2 $\mu\text{m}$              |
| 5                 | Cavity filling of prepatterned quartz substrates                       | 7 $\mu\text{m}$                 |
| 6                 | Inkjet Printing into prepatterned banks                                | 9.8 $\mu\text{m}$               |

**Table S2** The detailed linearly fitting results of the stress-strain curves of PQD@SPS and PQD@PS films.

| <b>PQD@SPS film</b>     |              |                      |                     |
|-------------------------|--------------|----------------------|---------------------|
| Equation                | y = a + b*x  |                      |                     |
| Weight                  | No Weighting |                      |                     |
| Residual Sum of Squares | 0.00123      |                      |                     |
| Adj. R-Square           | 0.99358      |                      |                     |
|                         |              | Value                | Standard Error      |
| stress                  | Intercept    | -6.06e <sup>-4</sup> | 4.55e <sup>-4</sup> |
| stress                  | Slope        | 0.93167              | 0.00602             |
| <b>PQD@PS film</b>      |              |                      |                     |
| Equation                | y = a + b*x  |                      |                     |
| Weight                  | No Weighting |                      |                     |
| Residual Sum of Squares | 0.00234      |                      |                     |
| Adj. R-Square           | 0.99493      |                      |                     |
|                         |              | Value                | Standard Error      |
| stress                  | Intercept    | -0.32153             | 0.00458             |
| stress                  | Slope        | 130.80527            | 2.03652             |

**Table S3** Average width shrinkages of pillars in PQD@SPS replicas and cavities in corresponding Si masters.

| <b>Width<br/>[<math>\mu\text{m}</math>]</b> | <b>Si-28/40</b> | <b>Si-27/30</b> | <b>Si-15/20</b> | <b>Si-14/10</b> |
|---------------------------------------------|-----------------|-----------------|-----------------|-----------------|
| Si master ( $W_1$ )                         | 41.00           | 29.75           | 19.60           | 9.85            |
| PQD@SPS replica<br>( $W_2$ )                | 40.10           | 28.77           | 19.40           | 10.11           |
| Shrinkage<br>( $W_1 - W_2 / W_1$ )          | 2.2%            | 3.3%            | 1.0%            | -2.6%           |

## References

1. P. Zhang, G. Yang, F. Li, J. Shi and H. Zhong. *Nat Commun.* 2022, **13**, 6713.
2. J. Yang, D. Hahm, K. Kim, S. Rhee, M. Lee, S. Kim, J. H. Chang, H. W. Park, J. Lim, M. Lee, H. Kim, J. Bang, H. Ahn, J. H. Cho, J. Kwak, B. Kim, C. Lee, W. K. Bae and M. S. Kang. *Nat Commun.* 2020, **11**, 2874.
3. Y. H. Kim, S. Koh, H. Lee, S. M. Kang, D. C. Lee and B. S. Bae. *ACS Appl Mater Interfaces.* 2020, **12**, 3961.
4. F. Li, C. Chen, S. Lu, X. Chen, W. Liu, K. Weng, Z. Fu, D. Liu, L. Zhang, H. Abudukeremu, L. Lin, Y. Wang, M. Zhong, H. Zhang and J. Li. *ACS Nano.* 2022, **16**, 13674.
5. S. Srivastava, K. E. Lee, E. A. Fitzgerald, S. J. Pennycook and S. Gradecak. *ACS Appl. Mater. Interfaces.* 2022, **14**, 48995.
6. Y. Yin, Z. Hu, M. U. Ali, M. Duan, L. Gao, M. Liu, W. Peng, J. Geng, S. Pan, Y. Wu, J. Hou, J. Fan, D. Li, X. Zhang and H. Meng. *Adv. Mater. Technol.* 2020, **5**, 2000251.
